# Supplementary material for: Genome-Resolved Metagenomics of Nitrogen Transformations in the Switchgrass Rhizosphere Microbiome on Marginal Lands
Source: Preprints.org preprint supplement (doi:10.20944/preprints202303.0168.v1), 2023-03-09
Supplement: Supplementary file 1 [file supplemental_table1.xlsx]

## Sheet: Sheet1
Adonis (Permanova) using unifrac (unweighted) distance
	DF	SumsOfSqs	MeanSqs	F.Model	R2	Pr(>F)
Block	3	0.30954	0.103179	1.278	0.46535	0.076
Type	1	0.11343	0.113431	1.405	0.17053	0.059
Residuals	3	0.2422	0.080734		0.36412
Total	7	0.66517															1
Adonis (Permanova) using unifrac (weighted) distance
	DF	SumsOfSqs	MeanSqs	F.Model	R2	Pr(>F)
Block	3	0.062896	0.020965	1.2733	0.46245	0.129
Type	1	0.023716	0.023716	1.4404	0.17437	0.085
Residuals	3	0.049394	0.016465		0.36318
Total	7	0.136006			1
Adonis (Permanova) using Bray-Curtis distance (paired, unweighted)
	DF	SumsOfSqs	MeanSqs	F.Model	R2	Pr(>F)
Block	3	0.25707	0.085691	1.2381	0.45093	0.158
Type	1	0.10538	0.105375	1.5225	0.18484	0.057
Residuals	3	0.20764	0.069214		0.36423
Total	7	0.57009			1
Adonis (Permanova) using Bray-Curtis distance (paired, weighted)
	DF	SumsOfSqs	MeanSqs	F.Model	R2	Pr(>F)
Block	3	0.25707	0.085691	1.2381	0.45093	0.158
Type	1	0.10538	0.105375	1.5225	0.18484	0.056
Residuals	3	0.20764	0.069214		0.36423
Total	7	0.57009			1
