# Supplementary material for: Genome-Resolved Metagenomics of Nitrogen Transformations in the Switchgrass Rhizosphere Microbiome on Marginal Lands
Source: Preprints.org preprint supplement (doi:10.20944/preprints202303.0168.v1), 2023-03-09
Supplement: Supplementary file 2 [file supplemental_table2.xlsx]

## Sheet: Sheet1
OTU	Sample	Abundance	sample_Sample	Type	Replicate	Urease_inhibitor	Nitrate_inhibitor	Block	Nitrogen	kingdom	phylum	class	Class
OTU2805	P2	0.0212515	P2	Post	2	Yes	Yes	B2	Pos	k__Bacteria	p__Acidobacteria	c__Acidobacteriia	Acidobacteriia
OTU2805	P4	0.0189753	P4	Post	4	Yes	Yes	B4	Pos	k__Bacteria	p__Acidobacteria	c__Acidobacteriia	Acidobacteriia
OTU2805	P3	0.0143266	P3	Post	3	Yes	Yes	B3	Pos	k__Bacteria	p__Acidobacteria	c__Acidobacteriia	Acidobacteriia
OTU2805	P1	0.00600858	P1	Post	1	Yes	Yes	B1	Pos	k__Bacteria	p__Acidobacteria	c__Acidobacteriia	Acidobacteriia
OTU3128	P1	0.206867	P1	Post	1	Yes	Yes	B1	Pos	k__Bacteria	p__Actinobacteria	c__Actinobacteria	Actinobacteria
OTU3128	P3	0.186246	P3	Post	3	Yes	Yes	B3	Pos	k__Bacteria	p__Actinobacteria	c__Actinobacteria	Actinobacteria
OTU3128	P4	0.180266	P4	Post	4	Yes	Yes	B4	Pos	k__Bacteria	p__Actinobacteria	c__Actinobacteria	Actinobacteria
OTU3128	P2	0.167651	P2	Post	2	Yes	Yes	B2	Pos	k__Bacteria	p__Actinobacteria	c__Actinobacteria	Actinobacteria
OTU158	P4	0.58444	P4	Post	4	Yes	Yes	B4	Pos	k__Bacteria	p__Proteobacteria	c__Alphaproteobacteria	Alphaproteobacteria
OTU158	P3	0.545845	P3	Post	3	Yes	Yes	B3	Pos	k__Bacteria	p__Proteobacteria	c__Alphaproteobacteria	Alphaproteobacteria
OTU158	P2	0.511216	P2	Post	2	Yes	Yes	B2	Pos	k__Bacteria	p__Proteobacteria	c__Alphaproteobacteria	Alphaproteobacteria
OTU158	P1	0.398283	P1	Post	1	Yes	Yes	B1	Pos	k__Bacteria	p__Proteobacteria	c__Alphaproteobacteria	Alphaproteobacteria
OTU77	P1	0.0128755	P1	Post	1	Yes	Yes	B1	Pos	k__Bacteria	p__Firmicutes	c__Bacilli	Bacilli
OTU77	P3	0.00286533	P3	Post	3	Yes	Yes	B3	Pos	k__Bacteria	p__Firmicutes	c__Bacilli	Bacilli
OTU77	P2	0	P2	Post	2	Yes	Yes	B2	Pos	k__Bacteria	p__Firmicutes	c__Bacilli	Bacilli
OTU77	P4	0	P4	Post	4	Yes	Yes	B4	Pos	k__Bacteria	p__Firmicutes	c__Bacilli	Bacilli
OTU603	P1	0.214592	P1	Post	1	Yes	Yes	B1	Pos	k__Bacteria	p__Proteobacteria	c__Betaproteobacteria	Betaproteobacteria
OTU603	P2	0.207792	P2	Post	2	Yes	Yes	B2	Pos	k__Bacteria	p__Proteobacteria	c__Betaproteobacteria	Betaproteobacteria
OTU603	P3	0.184814	P3	Post	3	Yes	Yes	B3	Pos	k__Bacteria	p__Proteobacteria	c__Betaproteobacteria	Betaproteobacteria
OTU603	P4	0.180266	P4	Post	4	Yes	Yes	B4	Pos	k__Bacteria	p__Proteobacteria	c__Betaproteobacteria	Betaproteobacteria
OTU4857	P2	0.0188902	P2	Post	2	Yes	Yes	B2	Pos	k__Bacteria	p__Cyanobacteria/Melainabacteria group	c__Cyanobacteria	Cyanobacteria
OTU4857	P1	0.0180258	P1	Post	1	Yes	Yes	B1	Pos	k__Bacteria	p__Cyanobacteria/Melainabacteria group	c__Cyanobacteria	Cyanobacteria
OTU4857	P3	0.00716332	P3	Post	3	Yes	Yes	B3	Pos	k__Bacteria	p__Cyanobacteria/Melainabacteria group	c__Cyanobacteria	Cyanobacteria
OTU4857	P4	0.0056926	P4	Post	4	Yes	Yes	B4	Pos	k__Bacteria	p__Cyanobacteria/Melainabacteria group	c__Cyanobacteria	Cyanobacteria
OTU1326	P3	0.00716332	P3	Post	3	Yes	Yes	B3	Pos	k__Bacteria	p__Proteobacteria	c__Deltaproteobacteria	Deltaproteobacteria
OTU1326	P1	0.00686695	P1	Post	1	Yes	Yes	B1	Pos	k__Bacteria	p__Proteobacteria	c__Deltaproteobacteria	Deltaproteobacteria
OTU1326	P4	0.00379507	P4	Post	4	Yes	Yes	B4	Pos	k__Bacteria	p__Proteobacteria	c__Deltaproteobacteria	Deltaproteobacteria
OTU1326	P2	0.00118064	P2	Post	2	Yes	Yes	B2	Pos	k__Bacteria	p__Proteobacteria	c__Deltaproteobacteria	Deltaproteobacteria
OTU2113	P1	0.120172	P1	Post	1	Yes	Yes	B1	Pos	k__Bacteria	p__Proteobacteria	c__Gammaproteobacteria	Gammaproteobacteria
OTU2113	P2	0.0472255	P2	Post	2	Yes	Yes	B2	Pos	k__Bacteria	p__Proteobacteria	c__Gammaproteobacteria	Gammaproteobacteria
OTU2113	P3	0.0358166	P3	Post	3	Yes	Yes	B3	Pos	k__Bacteria	p__Proteobacteria	c__Gammaproteobacteria	Gammaproteobacteria
OTU2113	P4	0.0151803	P4	Post	4	Yes	Yes	B4	Pos	k__Bacteria	p__Proteobacteria	c__Gammaproteobacteria	Gammaproteobacteria
OTU3747	P4	0.00379507	P4	Post	4	Yes	Yes	B4	Pos	k__Bacteria	p__Acidobacteria	c__Solibacteres	Solibacteres
OTU3747	P3	0.00286533	P3	Post	3	Yes	Yes	B3	Pos	k__Bacteria	p__Acidobacteria	c__Solibacteres	Solibacteres
OTU3747	P2	0.00236128	P2	Post	2	Yes	Yes	B2	Pos	k__Bacteria	p__Acidobacteria	c__Solibacteres	Solibacteres
OTU3747	P1	0	P1	Post	1	Yes	Yes	B1	Pos	k__Bacteria	p__Acidobacteria	c__Solibacteres	Solibacteres
OTU2886	P2	0.00826446	P2	Post	2	Yes	Yes	B2	Pos	k__Bacteria	p__Actinobacteria	c__Thermoleophilia	Thermoleophilia
OTU2886	P3	0.00573066	P3	Post	3	Yes	Yes	B3	Pos	k__Bacteria	p__Actinobacteria	c__Thermoleophilia	Thermoleophilia
OTU2886	P1	0.00343348	P1	Post	1	Yes	Yes	B1	Pos	k__Bacteria	p__Actinobacteria	c__Thermoleophilia	Thermoleophilia
OTU2886	P4	0.00189753	P4	Post	4	Yes	Yes	B4	Pos	k__Bacteria	p__Actinobacteria	c__Thermoleophilia	Thermoleophilia
OTU2805	I4	0.0357143	I4	Pre	4	No	No	B4	Neg	k__Bacteria	p__Acidobacteria	c__Acidobacteriia	Acidobacteriia
OTU2805	I3	0.0310881	I3	Pre	3	No	No	B3	Neg	k__Bacteria	p__Acidobacteria	c__Acidobacteriia	Acidobacteriia
OTU2805	I2	0.0283186	I2	Pre	2	No	No	B2	Neg	k__Bacteria	p__Acidobacteria	c__Acidobacteriia	Acidobacteriia
OTU2805	I1	0.0204724	I1	Pre	1	No	No	B1	Neg	k__Bacteria	p__Acidobacteria	c__Acidobacteriia	Acidobacteriia
OTU3128	I4	0.171429	I4	Pre	4	No	No	B4	Neg	k__Bacteria	p__Actinobacteria	c__Actinobacteria	Actinobacteria
OTU3128	I1	0.148031	I1	Pre	1	No	No	B1	Neg	k__Bacteria	p__Actinobacteria	c__Actinobacteria	Actinobacteria
OTU3128	I3	0.136442	I3	Pre	3	No	No	B3	Neg	k__Bacteria	p__Actinobacteria	c__Actinobacteria	Actinobacteria
OTU3128	I2	0.120354	I2	Pre	2	No	No	B2	Neg	k__Bacteria	p__Actinobacteria	c__Actinobacteria	Actinobacteria
OTU158	I4	0.605357	I4	Pre	4	No	No	B4	Neg	k__Bacteria	p__Proteobacteria	c__Alphaproteobacteria	Alphaproteobacteria
OTU158	I3	0.602763	I3	Pre	3	No	No	B3	Neg	k__Bacteria	p__Proteobacteria	c__Alphaproteobacteria	Alphaproteobacteria
OTU158	I2	0.585841	I2	Pre	2	No	No	B2	Neg	k__Bacteria	p__Proteobacteria	c__Alphaproteobacteria	Alphaproteobacteria
OTU158	I1	0.538583	I1	Pre	1	No	No	B1	Neg	k__Bacteria	p__Proteobacteria	c__Alphaproteobacteria	Alphaproteobacteria
OTU77	I3	0.00863558	I3	Pre	3	No	No	B3	Neg	k__Bacteria	p__Firmicutes	c__Bacilli	Bacilli
OTU77	I1	0.00472441	I1	Pre	1	No	No	B1	Neg	k__Bacteria	p__Firmicutes	c__Bacilli	Bacilli
OTU77	I4	0.00357143	I4	Pre	4	No	No	B4	Neg	k__Bacteria	p__Firmicutes	c__Bacilli	Bacilli
OTU77	I2	0	I2	Pre	2	No	No	B2	Neg	k__Bacteria	p__Firmicutes	c__Bacilli	Bacilli
OTU603	I1	0.225197	I1	Pre	1	No	No	B1	Neg	k__Bacteria	p__Proteobacteria	c__Betaproteobacteria	Betaproteobacteria
OTU603	I2	0.212389	I2	Pre	2	No	No	B2	Neg	k__Bacteria	p__Proteobacteria	c__Betaproteobacteria	Betaproteobacteria
OTU603	I3	0.139896	I3	Pre	3	No	No	B3	Neg	k__Bacteria	p__Proteobacteria	c__Betaproteobacteria	Betaproteobacteria
OTU603	I4	0.128571	I4	Pre	4	No	No	B4	Neg	k__Bacteria	p__Proteobacteria	c__Betaproteobacteria	Betaproteobacteria
OTU4857	I2	0.00353982	I2	Pre	2	No	No	B2	Neg	k__Bacteria	p__Cyanobacteria/Melainabacteria group	c__Cyanobacteria	Cyanobacteria
OTU4857	I1	0.00314961	I1	Pre	1	No	No	B1	Neg	k__Bacteria	p__Cyanobacteria/Melainabacteria group	c__Cyanobacteria	Cyanobacteria
OTU4857	I4	0.00178571	I4	Pre	4	No	No	B4	Neg	k__Bacteria	p__Cyanobacteria/Melainabacteria group	c__Cyanobacteria	Cyanobacteria
OTU4857	I3	0	I3	Pre	3	No	No	B3	Neg	k__Bacteria	p__Cyanobacteria/Melainabacteria group	c__Cyanobacteria	Cyanobacteria
OTU1326	I4	0.0125	I4	Pre	4	No	No	B4	Neg	k__Bacteria	p__Proteobacteria	c__Deltaproteobacteria	Deltaproteobacteria
OTU1326	I3	0.00863558	I3	Pre	3	No	No	B3	Neg	k__Bacteria	p__Proteobacteria	c__Deltaproteobacteria	Deltaproteobacteria
OTU1326	I2	0.00530973	I2	Pre	2	No	No	B2	Neg	k__Bacteria	p__Proteobacteria	c__Deltaproteobacteria	Deltaproteobacteria
OTU1326	I1	0.00314961	I1	Pre	1	No	No	B1	Neg	k__Bacteria	p__Proteobacteria	c__Deltaproteobacteria	Deltaproteobacteria
OTU2113	I3	0.0483592	I3	Pre	3	No	No	B3	Neg	k__Bacteria	p__Proteobacteria	c__Gammaproteobacteria	Gammaproteobacteria
OTU2113	I1	0.0393701	I1	Pre	1	No	No	B1	Neg	k__Bacteria	p__Proteobacteria	c__Gammaproteobacteria	Gammaproteobacteria
OTU2113	I2	0.0318584	I2	Pre	2	No	No	B2	Neg	k__Bacteria	p__Proteobacteria	c__Gammaproteobacteria	Gammaproteobacteria
OTU2113	I4	0.0160714	I4	Pre	4	No	No	B4	Neg	k__Bacteria	p__Proteobacteria	c__Gammaproteobacteria	Gammaproteobacteria
OTU3747	I3	0.0103627	I3	Pre	3	No	No	B3	Neg	k__Bacteria	p__Acidobacteria	c__Solibacteres	Solibacteres
OTU3747	I2	0.00884956	I2	Pre	2	No	No	B2	Neg	k__Bacteria	p__Acidobacteria	c__Solibacteres	Solibacteres
OTU3747	I4	0.00357143	I4	Pre	4	No	No	B4	Neg	k__Bacteria	p__Acidobacteria	c__Solibacteres	Solibacteres
OTU3747	I1	0.00314961	I1	Pre	1	No	No	B1	Neg	k__Bacteria	p__Acidobacteria	c__Solibacteres	Solibacteres
OTU2886	I4	0.0107143	I4	Pre	4	No	No	B4	Neg	k__Bacteria	p__Actinobacteria	c__Thermoleophilia	Thermoleophilia
OTU2886	I1	0.00787402	I1	Pre	1	No	No	B1	Neg	k__Bacteria	p__Actinobacteria	c__Thermoleophilia	Thermoleophilia
OTU2886	I2	0.00176991	I2	Pre	2	No	No	B2	Neg	k__Bacteria	p__Actinobacteria	c__Thermoleophilia	Thermoleophilia
OTU2886	I3	0.00172712	I3	Pre	3	No	No	B3	Neg	k__Bacteria	p__Actinobacteria	c__Thermoleophilia	Thermoleophilia
