# Supplementary material for: Genome-Resolved Metagenomics of Nitrogen Transformations in the Switchgrass Rhizosphere Microbiome on Marginal Lands
Source: Preprints.org preprint supplement (doi:10.20944/preprints202303.0168.v1), 2023-03-09
Supplement: Supplementary file 3 [file supplemental_table3.xlsx]

## Sheet: Sheet1
KEGG (KO) – Level I
	P1	P2	P3	P4	I1	I2	I3	I4
Cellular Processes	641	5105	3358	2813	4322	3508	1758	398
Environmental Information Processing	2238	19630	12994	11554	17316	13768	6779	1717
Genetic Information Processing	1316	12623	8759	7991	11549	8976	4468	1121
Human Diseases	266	2773	1763	1362	2374	1786	968	201
Metabolism	13490	125759	83057	77873	112470	88038	42374	11263
Organismal Systems	355	4258	2542	2279	3378	2752	1392	355
KEGG (KO) – Level II
	P1	P2	P3	P4	I1	I2	I3	I4
Amino Acid Metabolism	2830	26402	17483	16827	23964	18705	8919	2290
Biosynthesis of Other Secondary Metabolites	335	3020	1925	1915	2629	2045	992	259
Carbohydrate Metabolism	3314	29388	19442	18043	26278	20529	9856	2734
Cell Communication	4	63	26	13	26	26	12	5
Cell Growth and Death	212	1996	1358	1226	1884	1451	774	174
Cell Motility	329	1825	1261	956	1373	1216	564	118
Energy Metabolism	1671	14020	9567	8833	12586	9946	4750	1401
Environmental Adaptation	120	1532	895	760	1204	997	526	119
Folding, Sorting and Degradation	331	3225	2187	1957	2897	2301	1114	275
Glycan Biosynthesis and Metabolism	326	3322	2297	2072	3056	2406	1071	293
Lipid Metabolism	936	10008	6409	6006	8517	6787	3186	830
Membrane Transport	1161	10549	6627	6385	9123	6972	3690	887
Metabolism of Cofactors and Vitamins	953	9120	6076	5582	146	86	53	11
Metabolism of Other Amino Acids	620	6064	4020	3798	8263	6688	3092	872
Metabolism of Terpenoids and Polyketides	499	4567	3017	2820	5415	4204	2089	509
Nucleotide Metabolism	872	7942	5358	5024	4105	3241	1498	432
RNA family	0	0	0	0	7348	5729	2798	711
Replication and Repair	299	2816	1924	1827	0	0	0	0
Sensory System	0	7	2	3	2611	2090	974	290
Signal Transduction	1074	9041	6349	5147	2	4	2	0
Signaling Molecules and Interaction	3	40	18	22	8176	6774	3080	827
Transcription	153	1836	1204	1059	17	22	9	3
Translation	533	4746	3444	3148	1611	1246	643	149
Transport and Catabolism	96	1221	713	618	4430	3339	1737	407
Xenobiotics Biodegradation and Metabolism	1134	11906	7463	6953	1039	815	408	101
KEGG (KO) – Level IV DESeq2 sigtab
out of 3204 with nonzero total orf count (p-value < 0.05)
KO	baseMean	log2FoldChange	lfcSE	stat	pvalue
K03763	4.57523	-3.6162	1.3378	-2.7031	0.00686965
K00141	7.32205	-2.48492	0.937995	-2.64918	0.00806864
K03943	4.3874	-2.35775	1.12969	-2.08709	0.0368802
K07406	6.8917	-1.97171	0.952453	-2.07013	0.0384398
K04100	12.1955	-1.74757	0.738539	-2.36626	0.0179689
K02406	12.0428	-1.6759	0.766116	-2.18752	0.0287045
K01666	21.6388	-1.51978	0.756786	-2.0082	0.044622
K10219	10.9362	-1.42133	0.684206	-2.07734	0.0377703
K07642	9.76564	-1.33399	0.649077	-2.0552	0.0398593
K02556	32.4214	-1.10847	0.370959	-2.98813	0.00280691
K00055	22.1455	-1.10367	0.514262	-2.14613	0.031863
K04101	34.842	-0.927774	0.363218	-2.55432	0.0106395
K02405	35.0272	-0.880085	0.349355	-2.51917	0.0117632
K01624	31.0238	-0.873236	0.406222	-2.14965	0.0315826
K00626	1287.49	-0.394293	0.173326	-2.27487	0.0229137
K07694	32.861	0.94408	0.449191	2.10173	0.0355766
K11624	32.8492	0.990366	0.447911	2.21108	0.0270305
K07691	32.3598	0.997835	0.45589	2.18876	0.0286141
K00171	14.6539	1.67746	0.715468	2.34457	0.0190492

## Sheet: Sheet2
KO	baseMean	log2FoldChange	lfcSE	stat	pvalue
K03763	4.57523	-3.6162	1.3378	-2.7031	0.00686965
K00141	7.32205	-2.48492	0.937995	-2.64918	0.00806864
K03943	4.3874	-2.35775	1.12969	-2.08709	0.0368802
K07406	6.8917	-1.97171	0.952453	-2.07013	0.0384398
K04100	12.1955	-1.74757	0.738539	-2.36626	0.0179689
K02406	12.0428	-1.6759	0.766116	-2.18752	0.0287045
K01666	21.6388	-1.51978	0.756786	-2.0082	0.044622
K10219	10.9362	-1.42133	0.684206	-2.07734	0.0377703
K07642	9.76564	-1.33399	0.649077	-2.0552	0.0398593
K02556	32.4214	-1.10847	0.370959	-2.98813	0.00280691
K00055	22.1455	-1.10367	0.514262	-2.14613	0.031863
K04101	34.842	-0.927774	0.363218	-2.55432	0.0106395
K02405	35.0272	-0.880085	0.349355	-2.51917	0.0117632
K01624	31.0238	-0.873236	0.406222	-2.14965	0.0315826
K00626	1287.49	-0.394293	0.173326	-2.27487	0.0229137
K07694	32.861	0.94408	0.449191	2.10173	0.0355766
K11624	32.8492	0.990366	0.447911	2.21108	0.0270305
K07691	32.3598	0.997835	0.45589	2.18876	0.0286141
K00171	14.6539	1.67746	0.715468	2.34457	0.0190492
