# Supplementary material for: Genome-Resolved Metagenomics of Nitrogen Transformations in the Switchgrass Rhizosphere Microbiome on Marginal Lands
Source: Preprints.org preprint supplement (doi:10.20944/preprints202303.0168.v1), 2023-03-09
Supplement: Supplementary file 4 [file supplemental_table4.xlsx]

## Sheet: Sheet1
	Sample	gene	taxonomy	Max Score	Total Score	Query Cover	E value	Per. Ident	Accession
GKJNBGLO_06193	P1	nifH	Herbaspirillum frisingense	558	558	0.99	0	0.9215	WP_006463090.1
GKJNBGLO_440425	P3	nifH	Dechloromonas aromatica	602	602	1	0	0.9932	WP_011287173.1
GKJNBGLO_1686120	I4	nifH	HGW-Betaproteobacteria-11	558	558	0.96	0	0.9147	PKO84828.1
GKJNBGLO_06195	P1	nifK	Herbaspirillum rubrisubalbicans	937	1875	1	0	0.8343	WP_058895556.1
GKJNBGLO_06198	P1	nifK	Herbaspirillum rubrisubalbicans	458	458	1	1e-158	0.7742	WP_017453291.1
GKJNBGLO_06199	P1	nifK	Herbaspirillum sp. HC18	231	231	0.97	1e-71	0.72	RZI42973.1
GKJNBGLO_440423	P3	nifK	Dechloromonas sp. Dech2017	1034	2068	1	0	0.9234	WP_153150726.1
GKJNBGLO_462989	P3	nifK	Dechloromonas sp. HYN0024	886	886	1	0	0.9251	WP_117608732.1
GKJNBGLO_1529342	I4	nifK	Rhodocyclaceae bacterium	723	723	0.96	0	0.7748	RTL54339.1
GKJNBGLO_1686118	I4	nifK	Azonexus hydrophilus	962	1925	1	0	0.8678	WP_028996170.1
GKJNBGLO_06194	P1	nifD	Sulfuriferula sp. AH1	923	923	0.99	0	0.9006	WP_087445782.1
GKJNBGLO_06197	P1	nifD	Herbaspirillum sp. HC18	806	806	0.98	0	0.8257	RZI42972.1
GKJNBGLO_440424	P3	nifD	Dechloromonas denitrificans	970	970	1	0	0.9469	WP_066879934.1
GKJNBGLO_462990	P3	nifD	Dechloromonas sp. HYN0024	929	929	1	0	0.9592	WP_117608733.1
GKJNBGLO_1529343	I4	nifD	HGW-Betaproteobacteria-11	769	1538	1	0	0.872	PKO84840.1
GKJNBGLO_1686119	I4	nifD	HGW-Betaproteobacteria-7	959	959	1	0	0.9286	PKO34404.1
