# Supplementary material for: Genome-Resolved Metagenomics of Nitrogen Transformations in the Switchgrass Rhizosphere Microbiome on Marginal Lands
Source: Preprints.org preprint supplement (doi:10.20944/preprints202303.0168.v1), 2023-03-09
Supplement: Supplementary file 6 [file supplemental_table5.xlsx]

## Sheet: Sheet1
	Metawrap_ID	Classify genomes	Jspecies_ID	Z-score	rpS9_ID	E value	Per. Ident	Accession
I_MAG1	Bacteria	Bacteria	Sorangium cellulosum (GCA_001589185) So0011-07	0.92262	Actinobacteria bacterium 13_1_20CM_4_69_9	4e-58	0.771	OLD99224.1
I_MAG2	Bacteria	Bacteria	Microbacterium sp. TNHR37B	0.88367	Acidobacteria bacterium	3e-50	0.8	PYQ32104.1
I_MAG3	Nitrospiraceae	Bacteria	Nitrospira moscoviensis NSP M-1	0.92328	Nitrospira japonica	4e-85	0.9615	WP_080887927.1
I_MAG4	Bacteria	Bacteria	Oerskovia sp. Root22	0.86799	Gottschalkia purinilytica	4e-46	0.632	WP_050355701.1
I_MAG5	Bacteria	Bacteria	Sorangium cellulosum (GCA_001589185) So0011-07	0.92713	Gemmatimonadetes bacterium	1e-67	0.9852	PYO43538.1
I_MAG6	Bacteria	Bacteria	Acidobacteria bacterium SCGC AG-212-P17	0.88762	Acidobacteria bacterium	5e-82	0.9389	PYV46274.1
I_MAG7	Bacteria	Bacteria	Streptosporangium roseum DSM43021	0.88494	Acidobacteria bacterium	3e-66	0.8538	PYQ62181.1
I_MAG8	Nitrospiraceae	Bacteria	Nitrospira sp. SCGC AG-212-E16	0.95779	Nitrospira sp. CG24E	9e-85	0.9538	PLY20326.1
I_MAG9	Proteobacteria	Bacteria	Sorangium cellulosum (GCA_001589195) So0157-18	0.9177	Haliangium sp. UPWRP_2	1e-53	0.672	WP_088741134.1
I_MAG10	Bacteria	Bacteria	Mycobacterium chubuense NBB4	0.93231	Candidate division AD3	3e-48	0.8559	PZR81096.1
I_MAG11	Nitrospiraceae	Bacteria	Nitrospira sp. SCGC AG-212-E16	0.95936	Nitrospira japonica	1e-83	0.9462	WP_080887927.1
I_MAG12	Bacteria	Bacteria	Curtobacterium flaccumfaciens MEB126	0.89276	Gemmatimonadetes bacterium 13_1_40CM_70_15	2e-75	0.9394	OLC05918.1
I_MAG13	Bacteria	Bacteria	Mycobacterium obuense UC1	0.93803	Candidate division AD3	1e-54	0.8651	PZR81096.1
I_MAG14	Nitrospiraceae	Bacteria	Nitrospira sp. SCGC AG-212-E16	0.96432	Nitrospira japonica	3e-83	0.9462	WP_080887927.1
P_MAG1	Bacteria	Bacteria	Pedosphaera parvula Ellin514	0.87312	Verrucomicrobia bacterium	2e-70	0.797	PYI87073.1
P_MAG2	Sphingomonadaceae	Bacteria	Sphingomonas sp. SRS2	0.9701	Sphingomonas sp. Leaf33	1e-93	0.7955	WP_082441730.1
P_MAG3	Bacteria	Bacteria	Acidobacteria bacterium SCGC AG-212-P17	0.88942	Acidobacteria bacterium	5e-82	0.9389	PYV46274.1
P_MAG4	Bacteria	Bacteria	Acidobacteria bacterium SCGC AG-212-P17	0.96184	Acidobacteriia bacterium AA117	2e-78	0.8855	PYP82584.1
P_MAG5	Actinobacteria	Bacteria	Sandaracinus amylolyticus DSM 53668	0.91617	Actinobacteria bacterium IMCC26256	7e-39	0.7321	WP_082123616.1
P_MAG6	Enterobacteriaceae	Bacteria	Enterobacter asburiae (GCA_001011855) GN02073	0.98303	Enterobacteriaceae	9e-88	1	WP_064543072.1
P_MAG7	Bacteria	Bacteria	Nocardioides sp. Root190	0.8988	Solirubrobacterales bacterium 70-9	1e-58	0.8092	OJU83547.1
P_MAG8	Proteobacteria	Bacteria	Aromatoleum aromaticum EbN1	0.94108	Sulfuriferula multivorans	2e-75	0.8538	WP_124704662.1
P_MAG9	Bacteria	Bacteria	Opitutaceae bacterium IG16b	0.77138	Deltaproteobacteria bacterium	2e-76	0.8636	HCU25022.1
P_MAG10	Oxalobacteraceae	Bacteria	Massilia sp. Leaf139	0.96653	Janthinobacterium agaricidamnosum	4e-86	0.9846	WP_038496320.1
P_MAG11	Actinobacteria	Bacteria	Curtobacterium citreum NS330	0.87215	Chloroflexi bacterium	3e-74	0.8496	TAK02920.1
P_MAG12	Bacteria	Bacteria	Candidatus Koribacter versatilis Ellin345	0.88539	Acidobacteria bacterium	3e-84	0.9385	PYQ60060.1
P_MAG13	Bacteria	Bacteria	Microbacterium sp. TNHR37B	0.882	Acidobacteria bacterium	5e-83	0.9385	PYQ50975.1
P_MAG14	Sphingomonadales	Bacteria	Sphingopyxis sp. 113P3	0.91767	Sphingomonas sp. HMF7854	3e-79	0.875	WP_126718432.1
P_MAG15	Bacteria	Bacteria	Acidobacteria bacterium SCGC AG-212-P17	0.87495	Candidatus Sulfotelmatobacter sp. SbA7	7e-69	0.9008	WP_105292208.1
